# Supplementary material for: Cationic glyco-nanogels for epidermal growth factor receptor (EGFR) specific siRNA delivery in ovarian cancer cells
Source: Royal Society of Chemistry journal article supplement (doi:10.1039/c3py00425b), 2013-01-01
Supplement: c3py00425b.pdf [file c3py00425b.pdf]

# Cationic Glyco-nanogels for Epidermal Growth Factor Receptor (EGFR) specific siRNA delivery in Ovarian Cancer Cells

*Marya Ahmed<sup>†</sup>, Phanphen Wattanaarsakit<sup>§</sup>, Ravin Narain<sup>†\*</sup>*

*<sup>†</sup>Department of Chemical and Materials Engineering, University of Alberta, Edmonton, AB, T6G 2G6,  
Canada*

*<sup>§</sup>Department of Pharmaceutics and Industrial Pharmacy, Faculty of Pharmaceutical Sciences,  
Chulalongkorn University, Phyathai Road, Pathumwan, Bangkok, Thailand*

**Table S1.** Preparation of nanogels

| <b>Nanogels</b> | <b>PEGMA or<br/>NIPAM (mg)</b> | <b>AEMA (mg)</b> | <b>Macro-CTAs<br/>(mg)</b> | <b>CL (mg)</b> | <b>ACVA<br/>(mg)</b> |
|-----------------|--------------------------------|------------------|----------------------------|----------------|----------------------|
| <b>NGA1</b>     | 301                            | 66               | 380                        | 60             | 2                    |
| <b>NGA2</b>     | 200                            | 73               | 165                        | 133            | 1.6                  |

**NGA1: GAEMA<sub>63</sub>-*b*-(MeODEGM-*st*-AEMA-*st*-CL)<sub>100</sub>**

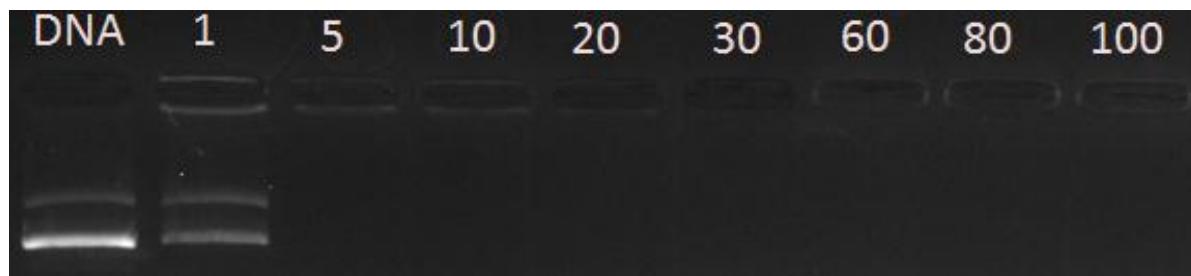

**NGA2: GAPMA<sub>57</sub>-*b*-(NIPAM-*st*-AEMA-*st*-CL)<sub>200</sub>**

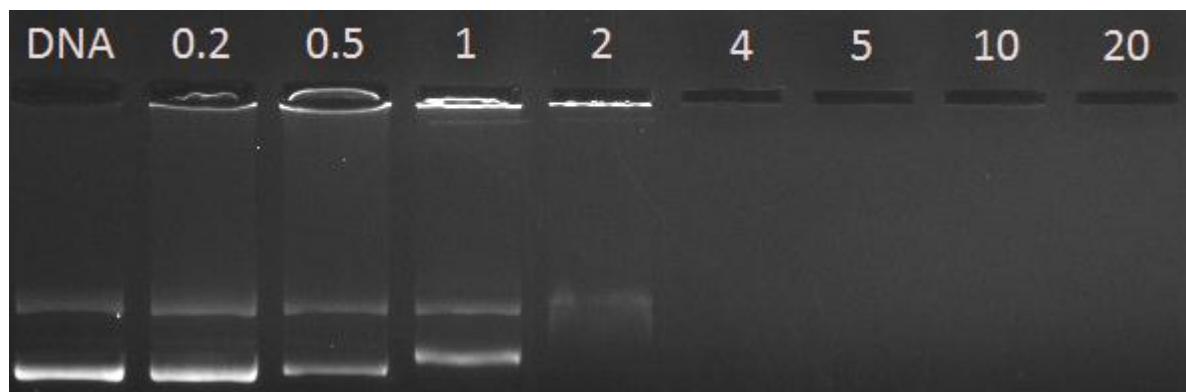

Figure S1: Complexation of  $\beta$ -galactosidase DNA with cationic glyco-nanogels, at varying w/w ratios.

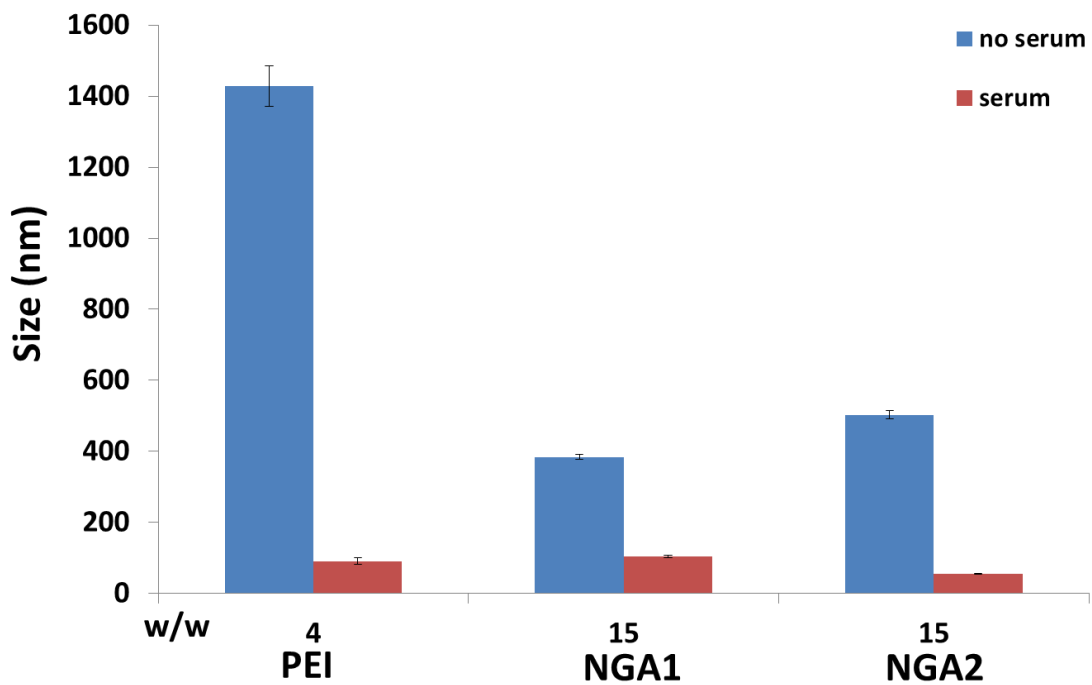

Figure S2: Size of nanogel-siRNA complexes in OMEM media in the absence and presence of serum proteins, as determined by DLS analysis.
